# Supplementary material for: Coordination Is Hard: Electronic Auction Mechanisms for Increased Efficiency in Transportation Logistics
Source: Atypon-hosted journal article supplement (doi:10.1287/mnsc.2018.3208), 2019-05-28
Supplement: mnsc.2018.3208.sm1.pdf [file mnsc.2018.3208.sm1.pdf]

### Appendix C: Core price computation (ONLINE ONLY)

Let  $W \subseteq I$  denote the set of winners,  $S^* = (S_1^*, \dots, S_{|I|}^*)$  the allocation that maximizes social welfare,  $p^{VCG} = (p_1^{VCG}, \dots, p_{|I|}^{VCG})$  the VCG payment vector,  $p^\tau = (p_1^\tau, \dots, p_{|I|}^\tau)$  the payment vector, and  $C^\tau \subseteq I$  the blocking coalition of bidders in iteration  $\tau$ .

Following Day and Raghavan (2007), we define the core separation problem, which yields the most violated core constraint, if any.  $S_i^*$  denotes the set of items that is allocated to bidder  $i$  from the set of winners  $W \subseteq I$ . To calculate equitable bidder-Pareto optimal (EBPO) core payments iteratively, the procedure is as follows. Solve the core separation problem (SEP $^\tau$ ):

$$z(p^\tau) = \max \sum_{i \in I} \sum_{S \neq \emptyset} v_i(S) x_{iS}^\tau - \sum_{i \in W} (v_i(S_i^*) - p_i^\tau) \gamma_{iS}^\tau \quad (\text{SEP}^\tau)$$

$$\text{s. t. } \sum_{i \in I} \sum_{S: \tau_{kt} \in S} x_{iS}^\tau \leq c_{kt} \quad \forall k \in K, t \in T, S \neq \emptyset, \quad (4a)$$

$$\sum_{S \neq \emptyset} x_{iS}^\tau \leq 1 \quad \forall i \in I \setminus W, \quad (4b)$$

$$\sum_{S \neq \emptyset} x_{iS}^\tau \leq \gamma_{iS}^\tau \quad \forall i \in W, \quad (4c)$$

$$x_{iS}^\tau \in \{0, 1\} \quad \forall i \in I, S \neq \emptyset, \quad (4d)$$

$$\gamma_{iS}^\tau \in \{0, 1\} \quad \forall i \in W, S \neq \emptyset. \quad (4e)$$

SEP $^\tau$  yields the most violated core constraint, if any. That is, it finds coalitions of bidders  $C^\tau$  that block the current outcome (who “would pay more” than the current payments, i.e., if  $z(p^\tau) > \sum_{i \in W} p_i^\tau$ , then there is a blocking coalition  $C^\tau = \{i | x_{iS}^\tau = 1\}$ ).  $\gamma_{iS}^\tau$  is a binary variable, which ensures that any winning bidder will be compensated his opportunity cost if selected as part of the optimal solution to SEP $^\tau$ . Let  $p^{core, \tau} = (p_1^{core, \tau}, \dots, p_{|I|}^{core, \tau})$  denote the (temporary) core payment vector in iteration  $\tau$ . Then, the minimal payments in the core satisfying the core constraints found (EBPOCORE) are calculated in EBPO $^\tau$ :

$$\theta^\tau(\epsilon) = \min \sum_{i \in W} p_i^{core, \tau} + \epsilon m^\tau \quad (\text{EBPO}^\tau)$$

$$\text{s. t. } \sum_{i \in W \setminus C^{\tau'}} p_i^{core, \tau} \geq z(p^{\tau'}) - \sum_{i \in W \cap C^{\tau'}} p_i^{\tau'} \quad \forall \tau' \leq \tau, \quad (\text{EBPOCORE})$$

$$p_i^{core, \tau} - m^\tau \leq p_i^{VCG} \quad \forall i \in W, \quad (5a)$$

$$p_i^{core, \tau} \leq v_i(S_i^*) \quad \forall i \in W, \quad (5b)$$

$$p_i^{core, \tau} \geq p_i^{VCG} \quad \forall i \in W. \quad (5c)$$

The minimal payments minimize potential gains from deviation and EBPO minimizes the maximum deviation from VCG payments as a secondary objective. Using a sufficiently small value of  $\epsilon$ , the calculated sum of payments is minimal in the core. This procedure is repeated until no further core constraint violation is found using (SEP $^\tau$ ), i.e., it is repeated while  $z(p^\tau) > \theta^{\tau-1}(\epsilon)$  with  $\theta^0(\epsilon) := \sum_i p_i^{VCG}$ .

Now, Algorithm 1 shows how core payments are computed in pseudo code. First, the winner determination problem is solved ( $\omega(I)$ ) and the VCG prices are calculated for the winners. Next, the core separation problem

is solved to find the most violated core constraint. Then, the minimal payments in the core satisfying the core constraints found are calculated. This procedure is repeated until no further core constraint violation is found.

---

**Algorithm 1:** Core constraints generation (following Day and Raghavan (2007, p. 1398))

---

```

 $W, S^* \leftarrow$  solve the winner determination problem  $\omega(I)$ 
foreach  $i \in W$  do
     $p_i^{\text{VCG}} \leftarrow$  compute the VCG price  $v_i(S_i^*) - (\omega(I) - \omega(I_{-i}))$ 
 $p^1 \leftarrow p^{\text{VCG}}$ 
 $\theta^0(\epsilon) \leftarrow \sum_i p_i^{\text{VCG}}$ 
 $\tau \leftarrow 1$ 
while true do
     $C^\tau \leftarrow$  solve the separation problem  $\text{SEP}^\tau$ 
    if  $z(p^\tau) > \theta^{\tau-1}(\epsilon)$  then
        add constraint  $\sum_{i \in W \setminus C^\tau} p_i^{\text{core}, \tau} \geq z(p^\tau) - \sum_{i \in W \cap C^\tau} p_i^\tau$  to  $\text{EBPO}^\tau$  and solve
         $p^{\tau+1} \leftarrow p^{\text{core}, \tau}$  from  $\text{EBPO}^\tau$ 
    else
         $p \leftarrow p^\tau$ 
        break
     $\tau \leftarrow \tau + 1$ 
    
```

---

Core payments suffer from sub-optimal computations of the WDP. For example, it might well be that  $\omega(I_{-i}) > \omega(I)$ , which would then lead to  $p_i^{\text{VCG}} > v_i(S_i^*)$ . The algorithms by Goetzendorff et al. (2015) trim payments or update the winning allocation, in cases a better one is found during the computation of payments. It was proposed for markets where it is possible to compute near-optimal allocations quickly (measured by the integrality gap of the MIP solver), but where proving optimality turns out to be intractable. We use the TRIM algorithm by Goetzendorff et al. (2015) in our experiments to deal with near-optimal allocations.

**Appendix D: Detailed Results (ONLINE ONLY)**

Each line in Table 11 describes a treatment combination consisting of the number of carriers, the warehouse capacity, and mechanism. We average over number of warehouses per tour. Computation times, seller revenue, winning bidder payments, and the numbers of submitted and winning bids are reported in a similar way in Tables 12 and 13.

| no. of carriers | warehouse capacity | mechanism  | mean waiting time per tour | mean RTT |
|-----------------|--------------------|------------|----------------------------|----------|
| 20              | 1                  | no coord.  | 113.09                     | 464.69   |
| 20              | 1                  | OPT        | 89.98                      | 449.09   |
| 20              | 1                  | Core0.1    | 90.64                      | 449.25   |
| 20              | 1                  | RaR B&C0.1 | 99.55                      | 456.33   |
| 20              | 1                  | RaR B&C1.0 | 103.02                     | 458.65   |
| 20              | 1                  | RaR        | 111.90                     | 463.48   |
| 20              | 2                  | no coord.  | 18.27                      | 369.88   |
| 20              | 2                  | OPT        | 4.50                       | 361.58   |
| 20              | 2                  | Core0.1    | 5.48                       | 362.35   |
| 20              | 2                  | RaR B&C0.1 | 8.64                       | 363.80   |
| 20              | 2                  | RaR B&C1.0 | 12.31                      | 366.06   |
| 20              | 2                  | RaR        | 17.40                      | 369.00   |
| 30              | 1                  | no coord.  | 225.86                     | 577.31   |
| 30              | 1                  | Core0.1    | 198.48                     | 554.41   |
| 30              | 1                  | OPT        | 195.72                     | 552.10   |
| 30              | 1                  | RaR B&C0.1 | 206.49                     | 561.92   |
| 30              | 1                  | RaR B&C1.0 | 211.33                     | 565.98   |
| 30              | 1                  | RaR        | 227.42                     | 578.90   |
| 30              | 2                  | no coord.  | 45.64                      | 397.09   |
| 30              | 2                  | OPT        | 22.06                      | 382.96   |
| 30              | 2                  | Core0.1    | 26.14                      | 387.17   |
| 30              | 2                  | RaR B&C0.1 | 29.55                      | 389.14   |
| 30              | 2                  | RaR B&C1.0 | 36.55                      | 393.09   |
| 30              | 2                  | RaR        | 45.99                      | 397.57   |
| 40              | 1                  | no coord.  | 348.13                     | 700.32   |
| 40              | 1                  | OPT        | 301.97                     | 657.97   |
| 40              | 1                  | Core0.1    | 304.95                     | 660.83   |
| 40              | 1                  | RaR B&C0.1 | 315.01                     | 670.67   |
| 40              | 1                  | RaR B&C1.0 | 321.32                     | 676.37   |
| 40              | 1                  | RaR        | 347.29                     | 699.48   |
| 40              | 2                  | no coord.  | 89.82                      | 442.01   |
| 40              | 2                  | OPT        | 64.71                      | 426.12   |
| 40              | 2                  | Core0.1    | 67.03                      | 426.91   |
| 40              | 2                  | RaR B&C0.1 | 68.97                      | 428.56   |
| 40              | 2                  | RaR B&C1.0 | 77.52                      | 434.41   |
| 40              | 2                  | RaR        | 88.95                      | 441.24   |

**Table 11** Mean waiting and round trip times per tour (in minutes).

| no. of carriers | warehouse capacity | mechanism  | mean comp. time | max. comp. time | mean revenue | mean payment |
|-----------------|--------------------|------------|-----------------|-----------------|--------------|--------------|
| 20              | 1                  | Pay-as-bid | 0.60            | 1.78            | 140.68       | 11.63        |
| 20              | 1                  | VCG        | 7.28            | 23.42           | 89.60        | 7.40         |
| 20              | 1                  | Core       | 15.85           | 76.66           | 123.86       | 10.24        |
| 20              | 1                  | Core0.1    | 12.11           | 62.15           | 124.08       | 10.52        |
| 20              | 1                  | RaR B&C0.1 | 7681.99         | 18608.53        | 68.10        | 8.00         |
| 20              | 1                  | RaR B&C1.0 | 24.73           | 74.78           | 55.45        | 8.30         |
| 20              | 1                  | RaR        | 0.33            | 0.58            | 0.44         | 0.44         |
| 20              | 2                  | Pay-as-bid | 0.09            | 0.27            | 236.74       | 11.84        |
| 20              | 2                  | VCG        | 1.14            | 2.74            | 5.62         | 0.28         |
| 20              | 2                  | Core       | 2.23            | 7.05            | 6.75         | 0.34         |
| 20              | 2                  | Core0.1    | 0.89            | 1.88            | 65.60        | 3.36         |
| 20              | 2                  | RaR B&C0.1 | 2805.83         | 7836.91         | 3.29         | 0.20         |
| 20              | 2                  | RaR B&C1.0 | 7.62            | 22.83           | 1.93         | 0.17         |
| 20              | 2                  | RaR        | 0.22            | 0.49            | 0.05         | 0.03         |
| 30              | 1                  | Pay-as-bid | 6.04            | 20.62           | 152.28       | 11.62        |
| 30              | 1                  | VCG        | 77.60           | 257.68          | 104.12       | 7.95         |
| 30              | 1                  | Core       | 121.68          | 439.96          | 139.93       | 10.68        |
| 30              | 1                  | Core0.1    | 96.28           | 400.61          | 141.22       | 11.03        |
| 30              | 1                  | RaR B&C0.1 | 12188.96        | 17611.05        | 78.29        | 8.11         |
| 30              | 1                  | RaR B&C1.0 | 78.94           | 202.53          | 62.77        | 8.22         |
| 30              | 1                  | RaR        | 0.65            | 1.19            | 0.51         | 0.51         |
| 30              | 2                  | Pay-as-bid | 8.65            | 46.60           | 313.73       | 11.71        |
| 30              | 2                  | VCG        | 236.35          | 1453.47         | 180.72       | 6.74         |
| 30              | 2                  | Core       | 501.92          | 2677.93         | 246.75       | 9.21         |
| 30              | 2                  | Core0.1    | 23.54           | 172.51          | 259.03       | 10.12        |
| 30              | 2                  | RaR B&C0.1 | 10826.56        | 27630.60        | 159.25       | 7.23         |
| 30              | 2                  | RaR B&C1.0 | 55.46           | 118.26          | 101.41       | 7.33         |
| 30              | 2                  | RaR        | 0.60            | 1.10            | 2.52         | 2.40         |
| 40              | 1                  | Pay-as-bid | 18.92           | 108.09          | 160.43       | 11.63        |
| 40              | 1                  | VCG        | 196.06          | 702.52          | 138.89       | 10.06        |
| 40              | 1                  | Core       | 275.63          | 858.31          | 153.77       | 11.14        |
| 40              | 1                  | Core0.1    | 220.46          | 712.80          | 153.93       | 11.24        |
| 40              | 1                  | RaR B&C0.1 | 17666.27        | 37750.68        | 88.40        | 8.51         |
| 40              | 1                  | RaR B&C1.0 | 194.83          | 428.78          | 72.31        | 8.64         |
| 40              | 1                  | RaR        | 1.18            | 2.17            | 0.59         | 0.59         |
| 40              | 2                  | Pay-as-bid | 174.49          | 914.03          | 345.35       | 11.59        |
| 40              | 2                  | VCG        | 5704.92         | 27836.04        | 215.12       | 7.22         |
| 40              | 2                  | Core       | 17823.52        | 103834.17       | 283.29       | 9.51         |
| 40              | 2                  | Core0.1    | 166.48          | 814.86          | 298.57       | 10.59        |
| 40              | 2                  | RaR B&C0.1 | 22345.39        | 50618.55        | 185.83       | 7.54         |
| 40              | 2                  | RaR B&C1.0 | 120.84          | 220.31          | 117.35       | 7.57         |
| 40              | 2                  | RaR        | 1.16            | 2.14            | 2.98         | 2.87         |

**Table 12** Computation times (in seconds), auctioneer revenue, and winning bidder payments for non-empty allocations (in monetary units). “Pay-as-bid” describes the values for the winner determination based on true valuations.

| no. of carriers | warehouse capacity | mechanism  | mean no. bids | mean no. win. bids | mean no. bids p. carrier | mean no. win. bids p. carrier |
|-----------------|--------------------|------------|---------------|--------------------|--------------------------|-------------------------------|
| 20              | 1                  | OPT        | 170.20        | 12.10              | 8.51                     | 0.60                          |
| 20              | 1                  | Core0.1    | 170.20        | 11.80              | 8.51                     | 0.59                          |
| 20              | 1                  | RaR B&C0.1 | 170.20        | 8.51               | 8.51                     | 0.43                          |
| 20              | 1                  | RaR B&C1.0 | 170.20        | 6.68               | 8.51                     | 0.33                          |
| 20              | 1                  | RaR        | 170.20        | 0.06               | 8.51                     | 0.00                          |
| 20              | 2                  | OPT        | 170.00        | 20.00              | 8.50                     | 1.00                          |
| 20              | 2                  | Core0.1    | 170.00        | 19.50              | 8.50                     | 0.97                          |
| 20              | 2                  | RaR B&C0.1 | 170.00        | 16.45              | 8.50                     | 0.82                          |
| 20              | 2                  | RaR B&C1.0 | 170.00        | 10.00              | 8.50                     | 0.50                          |
| 20              | 2                  | RaR        | 170.00        | 0.25               | 8.50                     | 0.01                          |
| 30              | 1                  | OPT        | 255.20        | 13.10              | 8.51                     | 0.44                          |
| 30              | 1                  | Core0.1    | 255.20        | 12.80              | 8.51                     | 0.43                          |
| 30              | 1                  | RaR B&C0.1 | 255.20        | 9.65               | 8.51                     | 0.32                          |
| 30              | 1                  | RaR B&C1.0 | 255.20        | 7.64               | 8.51                     | 0.25                          |
| 30              | 1                  | RaR        | 255.20        | 0.06               | 8.51                     | 0.00                          |
| 30              | 2                  | OPT        | 255.30        | 26.80              | 8.51                     | 0.89                          |
| 30              | 2                  | Core0.1    | 255.30        | 25.60              | 8.51                     | 0.85                          |
| 30              | 2                  | RaR B&C0.1 | 255.30        | 22.02              | 8.51                     | 0.73                          |
| 30              | 2                  | RaR B&C1.0 | 255.30        | 13.84              | 8.51                     | 0.46                          |
| 30              | 2                  | RaR        | 255.30        | 0.35               | 8.51                     | 0.01                          |
| 40              | 1                  | OPT        | 342.40        | 13.80              | 8.56                     | 0.35                          |
| 40              | 1                  | Core0.1    | 342.40        | 13.70              | 8.56                     | 0.34                          |
| 40              | 1                  | RaR B&C0.1 | 342.40        | 10.39              | 8.56                     | 0.26                          |
| 40              | 1                  | RaR B&C1.0 | 342.40        | 8.37               | 8.56                     | 0.21                          |
| 40              | 1                  | RaR        | 342.40        | 0.07               | 8.56                     | 0.00                          |
| 40              | 2                  | OPT        | 342.20        | 29.80              | 8.56                     | 0.74                          |
| 40              | 2                  | Core0.1    | 342.20        | 28.20              | 8.56                     | 0.70                          |
| 40              | 2                  | RaR B&C0.1 | 342.20        | 24.65              | 8.56                     | 0.62                          |
| 40              | 2                  | RaR B&C1.0 | 342.20        | 15.51              | 8.56                     | 0.39                          |
| 40              | 2                  | RaR        | 342.20        | 0.39               | 8.56                     | 0.01                          |

Table 13 Numbers of (winning) bids.
